# Supplementary material
Source: publisher figshare collection journal article supplement (https://gsajournals.figshare.com/ndownloader/files/31693265)
Supplement: Supplementary file 1 [file 31693265]

## Sheet: Sheet1
Table S1 - Hi-C datasets associated with this work, merged datasets in bold.
DpnII-derived Datasets	Pair Considered	Pairs Mapped	Valid Reads ("Hi-C Contacts")	% All Reads Valid
WT N150+N3752 DpnII 8PCR merged - 270M reads	269893555	218260445	89236812	33.06
WT N150 DpnII 8PCR rep1B	65325224	52967578	23354127	35.75
WT N150 DpnII 8PCR rep3B	78633634	62739691	27380722	34.82
WT N150 DpnII 8PCR rep4B	83240508	65405200	29315138	35.22
WT N3752 DpnII 8PCR sample	42694189	36000212	9039426	21.17
WT N150 DpnII 15PCR merged	131172643	92950755	37645558	28.7
WT N150 DpnII 15PCR rep1	44702513	34388549	14832659	33.18
WT N150 DpnII 15PCR rep3	39553321	30092025	11615109	29.37
WT N150 DpnII 15PCR rep4	31118205	23358835	9825422	31.57
WT N150 DpnII 23PCR merged	100663652	78888147	33724986	33.5
WT N150 DpnII 23PCR rep3	51938257	40598553	16815807	32.38
WT N150 DpnII 23PCR rep4	48643379	38233483	16977200	34.9
MseI-derived Datasets	Pair Considered	Pairs Mapped	Valid Reads ("Hi-C Contacts")	% All Reads Valid
WT N150+N3752 MseI 8PCR merged - 72M reads	72368321	59740092	16691701	23.06
WT N150 MseI 8PCR rep3	33872051	26124973	9325092	27.53
WT N150 MseI 8PCR rep4	25170489	21055771	4417508	17.55
WT N3752 MseI 8PCR sample	34752833	30270171	6660070	19.16
DpnII & MseI single fastq comprehensive Dataset	Pair Considered	Pairs Mapped	Valid Reads ("Hi-C Contacts")	% All Reads Valid
WT N150+N3752 DpnII+MseI 8PCR merged single fastq - 342M reads	342261876	278000537	105928513	30.95
DpnII & MseI double digest Dataset	Pair Considered	Pairs Mapped	Valid Reads ("Hi-C Contacts")	% All Reads Valid
WT N150 DpnII & MseI 8PCR double digest merged - 456M reads	456036737	401432683	76576793	16.79
WT N150 DpnII & MseI 8PCR double digest rep 3	56574891	45001055	10873134	19.21
WT N150 DpnII & MseI 8PCR double digest rep 4	23462245	19714188	3055949	13.02
WT N150 DpnII & MseI 8PCR double digest rep 5	42099719	38253148	5524576	13.12
WT N3752 DpnII & MseI 8PCR double digest rep 6	171058998	154426170	22707441	13.27
WT N150 DpnII & MseI 8PCR double digest rep 7	137502307	122254890	30967724	22.52
WT N150 DpnII & MseI 8PCR double digest rep 8	25338577	21783232	3620434	14.29
